# Supplementary material for: High electron transfer capacity of thio-derivatives of tea catechins measured using a water soluble stable free radical and their effects on colon cancer cells
Source: Royal Society of Chemistry journal article supplement (doi:10.1039/c3nj00172e), 2013-01-01
Supplement: c3nj00172e.pdf [file c3nj00172e.pdf]

## High electron transfer capacity of thio-derivatives of tea catechins measured with a water soluble stable free radical and effects on colon cancer cells

Anna Carreras,<sup>a†</sup> Juan Antonio Mesa,<sup>a†</sup> Marta Cascante,<sup>b</sup> Josep Lluís Torres<sup>a\*</sup> and Luis Juliá<sup>a\*</sup>

<sup>a</sup> Department of Biological Chemistry and Molecular Modelling, Institute for Advanced Chemistry of Catalonia, CSIC, Jordi Girona 18-26, 08034 Barcelona (Spain).

<sup>b</sup> Department of Biochemistry and Molecular Biology, Unit Associated with CSIC, University of Barcelona, Avinguda Diagonal, 645, 08028 Barcelona (Spain).

<sup>†</sup> A.C. and J.A.M. contributed equally to this work.

### SUPPLEMENTARY MATERIAL

| <b><u>Table of contents</u></b>                               | <b><u>pag</u></b> |
|---------------------------------------------------------------|-------------------|
| <sup>1</sup> H NMR (D <sub>2</sub> O, 400 MHz) of <b>5</b>    | <u>e</u><br>2     |
| <sup>13</sup> C NMR (CD <sub>3</sub> OD, 400 MHz) of <b>5</b> | 2                 |
| <sup>1</sup> H NMR (D <sub>2</sub> O, 400 MHz) of <b>7</b>    | 3                 |
| <sup>13</sup> C NMR (CD <sub>3</sub> OD, 400 MHz) of <b>7</b> | 3                 |
| HRMS of <b>5</b> and <b>7</b>                                 | 4                 |

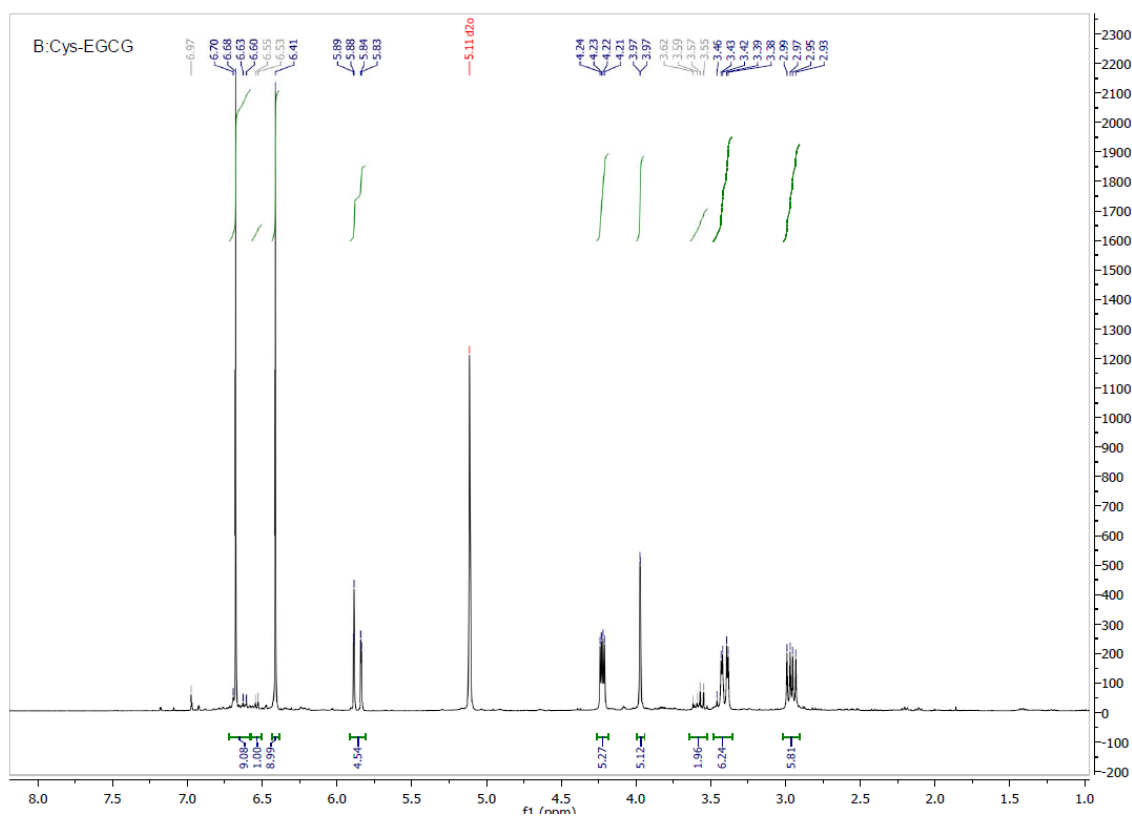

**Figure S1.**  $^1\text{H}$  NMR spectrum of Cys-EGCG (5)

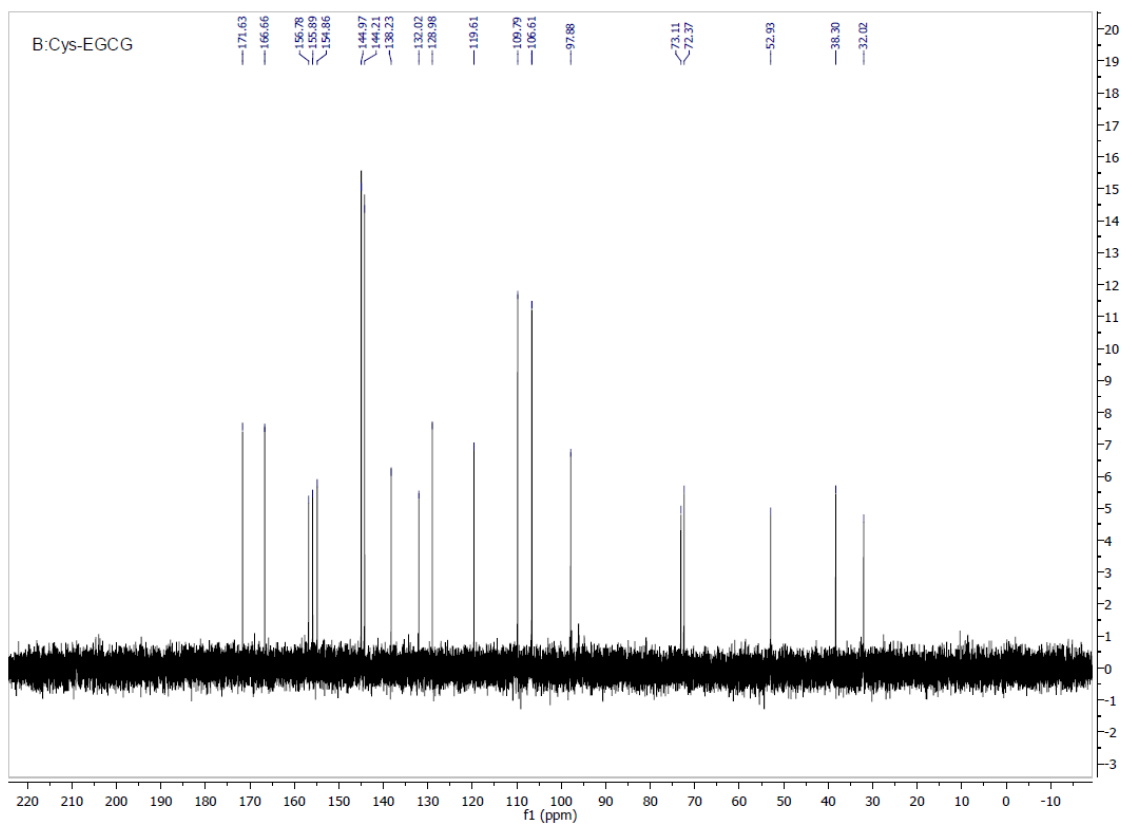

**Figure S2.**  $^{13}\text{C}$  NMR spectrum of EGCG (5)

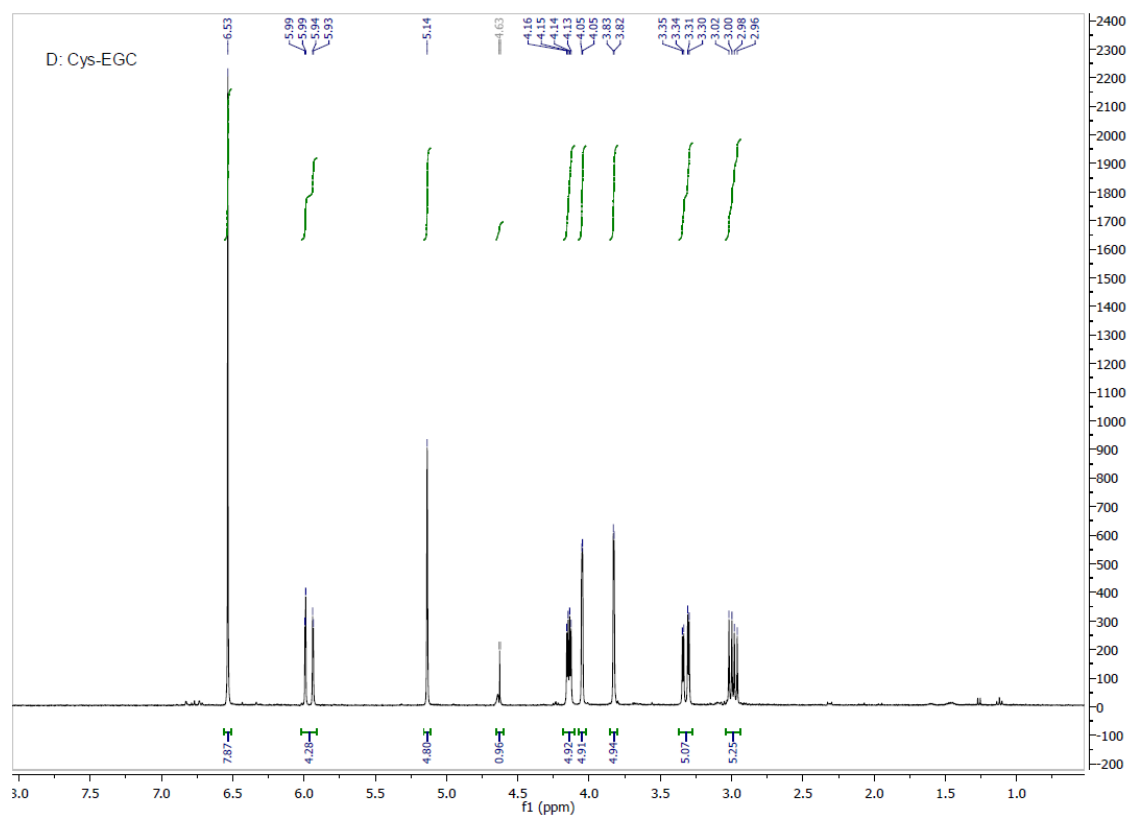

Figure S3. <sup>1</sup>H NMR spectrum of Cys-EGC (7)

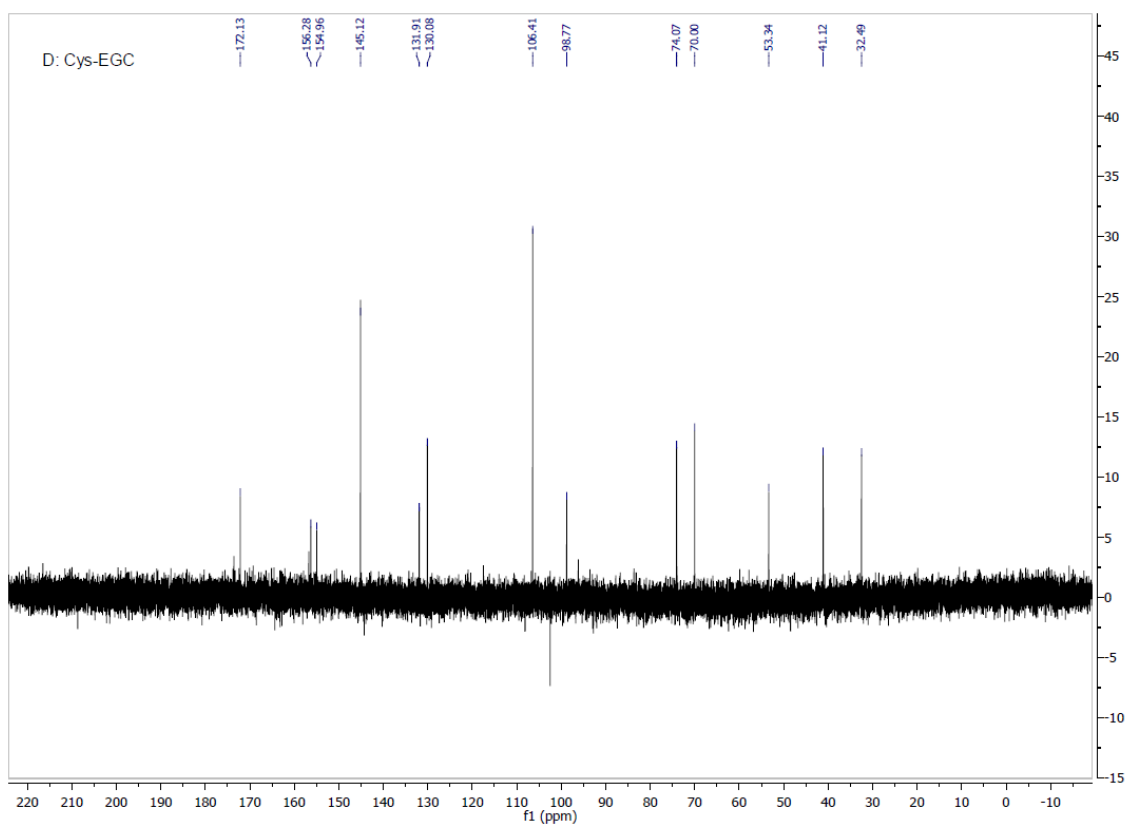

Figure S4. <sup>13</sup>C NMR spectrum of EGC (7)

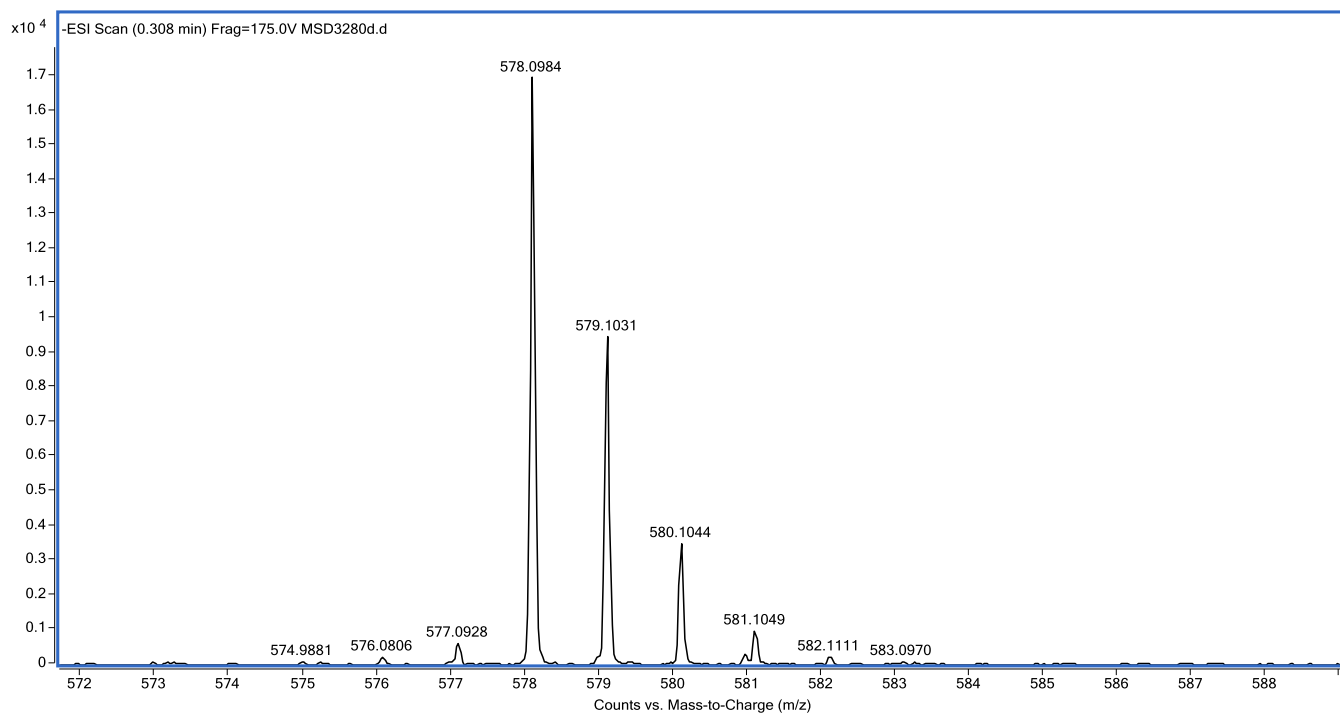

**Figure S5. HRMS of Cys-EGCG (5)**

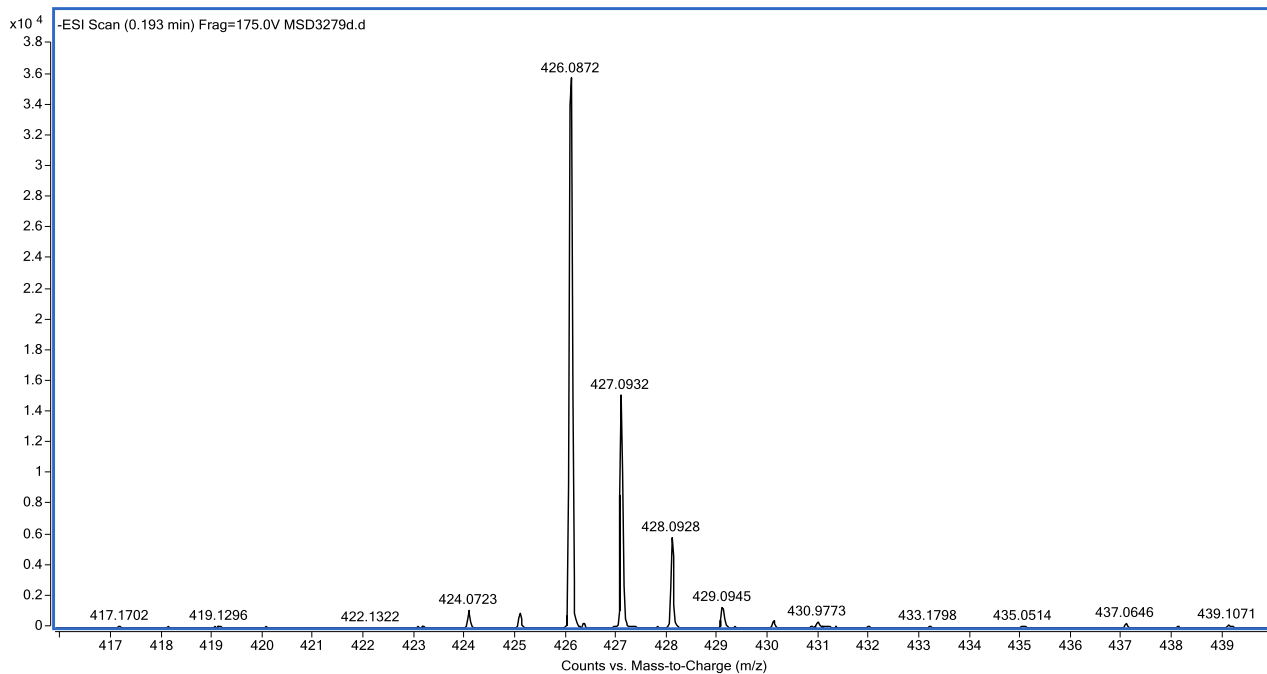

**Figure S6. HRMS of Cys-EGC (7)**
